# Supplementary material for: Synthesis of a Morpholino Nucleic Acid (MNA)-Uridine Phosphoramidite, and Exon Skipping Using MNA/2′-O-Methyl Mixmer Antisense Oligonucleotide
Source: PubMed Central journal article supplement (PMC6274534; doi:10.3390/molecules21111582), 2016-11-22
Supplement: molecules-21-01582-s001.pdf [file molecules-21-01582-s001.pdf]

# Supplementary Materials: Synthesis of Morpholino Nucleic Acid (MNA)-Uridine Phosphoramidite, and Exon Skipping Using MNA/2'-O-Methyl Mixmer Antisense Oligonucleotides

Suxiang Chen, Bao T. Le, Kamal Rahimizadeh, Khalil Shaikh, Narinder Mohal and Rakesh N. Veedu

## 1. Purity of the Synthesized Antisense Oligonucleotides

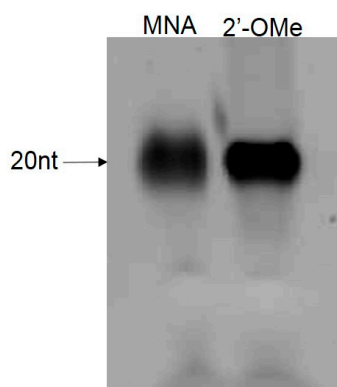

Figure S1. Analysis of the purity of the synthesized AOs by 15% denaturing polyacrylamide gel electrophoresis.

## 2. MALDI-ToF MS Analysis of Antisense Oligonucleotides

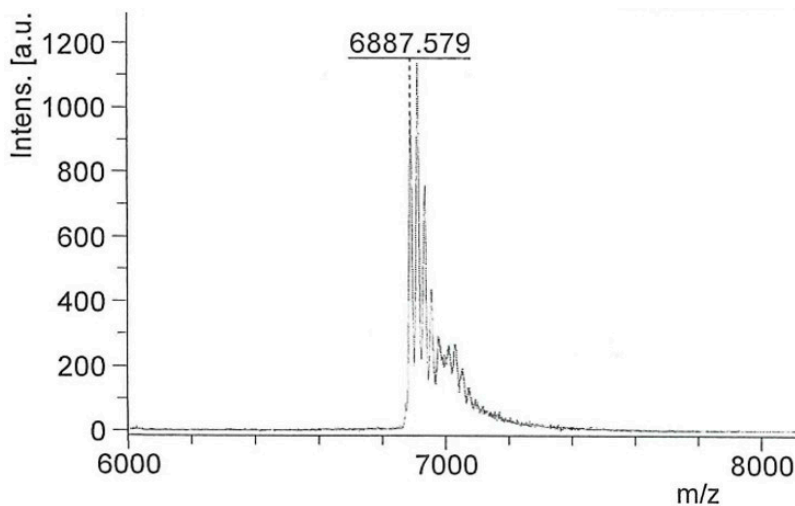

Figure S2. MALDI-ToF MS analysis of 2'-OMePS AO. Calculated: 6887.5 Da; Found: 6887.579 Da.

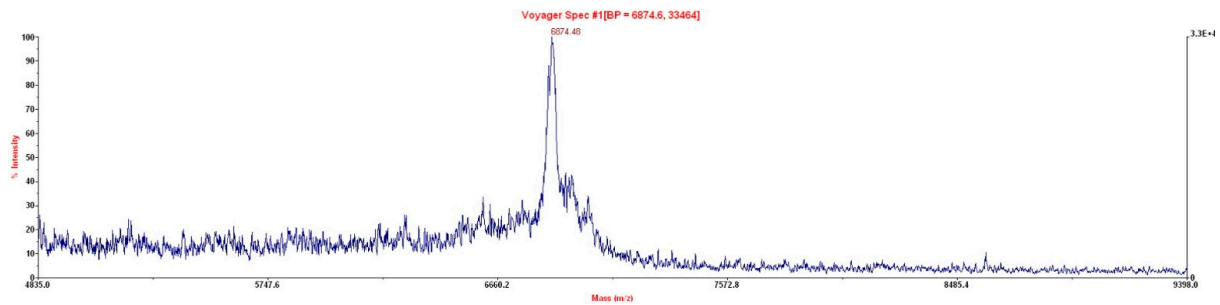

Figure S3. MALDI-ToF MS analysis of MNA/2'-OMePS AO. Calculated: 6872.5 Da; Found: 6874.48 Da.

### 3. RT-PCR and Densitometry Analysis Data

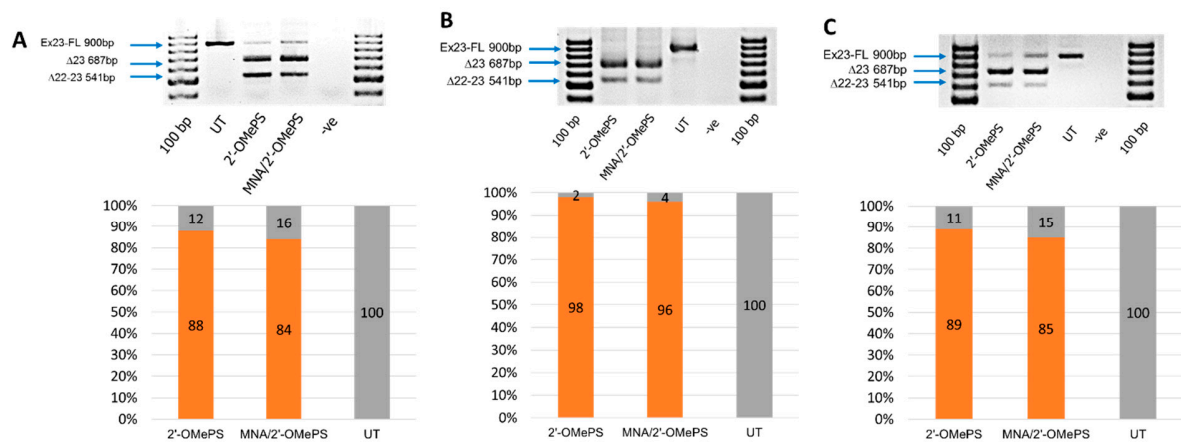

Figure S4. RT-PCR and densitometry analysis of exon 23 skipping in cultured *mdx* myotubes. A, B, C: RT-PCR results and densitometry data shown in triplicates. ■ Percentage of exon-skipping products; ■ Percentage of full length product; UT: Untreated.

### 4. In Vitro Evaluation of Cell Viability

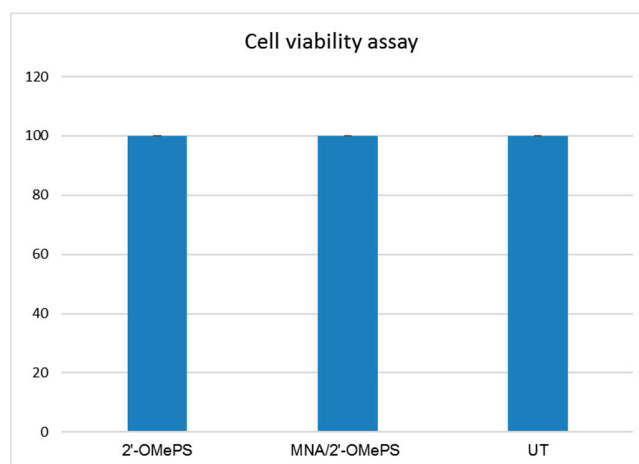

Figure S5. Cell viability assay after 24 h of transfection. UT: Untreated.
